# Supplementary material for: Low temperature FT-IR and molecular orbital study of N,N-dimethylglycine methyl ester: Proof for different ground conformational states in gas phase and in condensed media
Source: Royal Society of Chemistry journal article supplement (doi:10.1039/b209311c), 2002-12-13
Supplement: tables.doc [file tables.doc]

TABLE S1 (supplementary material). Optimised geometries for the most stable conformers of dimethyl glycine methyl estera

| Parameter | ASC |  | GSC |  |
| --- | --- | --- | --- | --- |
|  | DFT/B3LYP | MP2 | DFT/B3LYP | MP2 |
| Bond lengths/ pm |  |  |  |  |
| C1=O2 | 120.6 | 122.3 | 120.4 | 122.0 |
| C1-O3 | 135.2 | 135.9 | 135.3 | 136.0 |
| C1-C13 | 153.3 | 152.6 | 152.2 | 151.6 |
| O3-C16 | 144.1 | 144.5 | 144.0 | 144.4 |
| N4-C5 | 145.9 | 145.9 | 145.7 | 145.9 |
| N4-C9 | 145.9 | 145.9 | 146.0 | 146.0 |
| N4-C13 | 144.3 | 144.4 | 144.8 | 144.8 |
| C5-H6 | 110.0 | 109.6 | 110.7 | 110.3 |
| C5-H7 | 109.4 | 109.0 | 109.3 | 109.0 |
| C5-H8 | 109.4 | 109.0 | 109.2 | 108.9 |
| C9-H10 | 110.0 | 109.6 | 110.7 | 110.3 |
| C9-H11 | 109.4 | 109.0 | 109.2 | 108.9 |
| C9-H12 | 109.4 | 109.0 | 108.9 | 108.6 |
| C13-H14 | 109.6 | 109.4 | 110.8 | 110.5 |
| C13-H15 | 109.6 | 109.4 | 109.4 | 109.2 |
| C16-H17 | 108.8 | 108.5 | 108.7 | 108.5 |
| C16-H18 | 109.1 | 108.7 | 109.1 | 108.7 |
| C16-H19 | 109.1 | 108.7 | 109.1 | 108.7 |
| Bond angles/° |  |  |  |  |
| O2=C1-O3 | 123.5 | 123.6 | 123.5 | 123.7 |
| O2=C1-C13 | 126.3 | 126.4 | 127.2 | 127.3 |
| C1-O3-C16 | 116.3 | 114.6 | 116.0 | 114.5 |
| C5-N4-C9 | 113.6 | 112.5 | 111.6 | 110.3 |
| C5-N4-C13 | 115.0 | 113.8 | 111.3 | 109.8 |
| C9-N4-C13 | 115.0 | 113.8 | 112.9 | 111.5 |
| N4-C5-H6 | 113.7 | 113.5 | 113.1 | 112.6 |
| N4-C5-H7 | 109.5 | 109.0 | 110.1 | 109.6 |
| N4-C5-H8 | 109.0 | 108.5 | 109.4 | 109.0 |
| H6-C5-H7 | 107.7 | 108.1 | 108.2 | 108.6 |
| H6-C5-H8 | 108.5 | 108.7 | 108.0 | 108.5 |
| N4-C9-H10 | 113.7 | 113.5 | 112.4 | 111.8 |
| N4-C9-H11 | 109.0 | 108.6 | 109.2 | 108.9 |
| N4-C9-H12 | 109.5 | 109.0 | 110.0 | 109.7 |
| H10-C9-H12 | 108.5 | 109.0 | 109.0 | 109.4 |
| H10-C9-H11 | 107.7 | 108.1 | 108.1 | 108.5 |
| C1-C13-N4 | 117.3 | 116.8 | 114.3 | 113.5 |
| C1-C13-H14 | 107.0 | 107.2 | 107.2 | 107.5 |
| C1-C13-H15 | 107.0 | 107.2 | 106.5 | 106.9 |
| N4-C13-H14 | 109.6 | 109.3 | 113.3 | 113.0 |
| N4-C13-H15 | 109.6 | 109.3 | 109.3 | 109.1 |
| O3-C16-H17 | 105.5 | 105.0 | 105.5 | 105.0 |
| O3-C16-H18 | 110.4 | 110.2 | 110.5 | 110.2 |
| O3-C16-H17 | 110.4 | 110.2 | 110.5 | 110.2 |
| Dihedral angles/° |  |  |  |  |
| O2=C1-O3-C16 | 0.0 | 0.0 | -0.1 | -0.2 |
| N4-C13-C1=O2 | 0.0 | 0.0 | 2.1 | 1.3 |
| O2=C1-C13-H14 | 124.0 | 123.0 | -124.3 | -124.4 |
| O2=C1-C13-H15 | -124.0 | -123.0 | 122.8 | 121.6 |
| C13-N4-C5-H6 | 71.7 | 70.0 | 63.9 | 61.7 |
| C13-N4-C5-H7 | -49.8 | -51.5 | -57.4 | -59.4 |
| C13-N4-C5-H8 | -167.3 | -169.0 | -175.8 | -178.0 |
| C13-N4-C9-H10 | -71.7 | -70.0 | -62.8 | -60.3 |
| C13-N4-C9-H11 | 167.3 | 169.0 | 177.2 | 179.9 |
| C13-N4-C9-H12 | 49.8 | 51.5 | 58.8 | 61.2 |
| C5-N4-C13-C1 | -67.4 | -65.3 | 163.3 | 167.0 |
| C9-N4-C13-C1 | 67.4 | 65.3 | -70.3 | -70.4 |
| C13-C1-O3-C16 | 180.0 | 180.0 | 179.9 | 179.8 |
| C1-O3-C16-H17 | 180.0 | 180.0 | -179.7 | -179.9 |
| C1-O3-C16-H18 | -60.5 | -60.4 | -60.1 | -60.4 |
| C1-O3-C16-H19 | 60.5 | 60.4 | 60.7 | 60.6 |
| Rotational constants/MHz |  |  |  |  |
| A | 4527.7899 | 4494.1962 | 5039.6619 | 5039.5498 |
| B | 1082.4161 | 1107.1570 | 1041.2777 | 1053.7111 |
| C | 1075.1726 | 1094.5469 | 932.0013 | 942.1010 |

a See Figure 1 for atom numbering.

TABLE S2 (electronic supplementary material) - Total Mülliken atomic charges in the most stable conformers of dimethyl glycine methyl ester.a

|  | Conformer | | | |
| --- | --- | --- | --- | --- |
|  | ASC |  | GSC |  |
| Atom | DFT/B3LYP | MP2 | DFT/B3LYP | MP2 |
| C1 | 0.029 | 0.225 | 0.224 | 0.404 |
| O2 | -0.270 | -0.542 | -0.284 | -0.543 |
| O3 | -0.089 | -0.441 | -0.107 | -0.443 |
| N4 | 0.047 | -0.255 | 0.083 | -0.193 |
| C5 | -0.355 | -0.214 | -0.311 | -0.167 |
| H6 | 0.137 | 0.115 | 0.126 | 0.102 |
| H7 | 0.125 | 0.086 | 0.128 | 0.091 |
| H8 | 0.149 | 0.130 | 0.125 | 0.113 |
| C9 | -0.355 | -0.214 | -0.402 | -0.259 |
| H10 | 0.126 | 0.086 | 0.124 | 0.080 |
| H11 | 0.137 | 0.115 | 0.158 | 0.142 |
| H12 | 0.149 | 0.130 | 0.130 | 0.114 |
| C13 | -0.355 | 0.038 | -0.617 | -0.151 |
| H14 | 0.208 | 0.171 | 0.185 | 0.151 |
| H15 | 0.208 | 0.171 | 0.184 | 0.164 |
| C16 | -0.254 | -0.001 | -0.254 | 0.001 |
| H17 | 0.177 | 0.135 | 0.156 | 0.124 |
| H18 | 0.177 | 0.135 | 0.171 | 0.138 |
| H19 | 0.147 | 0.128 | 0.181 | 0.133 |

a Charges in units of electron. 1*e*= 1.6 x 10-19 Coulombs. See Figure 1 for atom numbering.

Table S3 (Electronic Supplementary Material) – Definition of symmetry coordinatesa

Definition Symmetryb Approximate description

S1  C1-O2 A´ C=O

S2 C1-O3 A´ C-O

S3 O3-C16 A´ O-C

S4 C1-C13 A´ C-C

S5 (C13-H15)+  (C13-H14) A´ CH2s

S6 (C13-H15)-  (C13-H14) A´´ CH2as

S7 C13-N4 A´ C-N

S8 (N4-C5)+ (N4-C9) A´ N-Cs

S9 (N4-C5)- (N4-C9) A´´ N-Cas

S10 (C5-H7)+ (C5-H6)+ (C5-H8)+ (C9-H10)+ (C9-H11)+ (C9-H12) A´ CH3s(1)

S11 (C5-H7)+ (C5-H6)+ (C5-H8)- (C9-H10)-(C9-H11)- (C9-H12) A´´ CH3s(2)

S12 2(C5-H7)- (C5-H6)- (C5-H8)+2(C9-H10)- (C9-H11)- (C9-H12) A´ CH3as´(1)

S13 2(C5-H7)- (C5-H6)- (C5-H8)-2(C9-H10)+ (C9-H11)+ (C9-H12) A´´ CH3as´(2)

S14 (C5-H8)- (C5-H6)+ (C9-H11)- (C9-H12) A´ CH3as´´(1)

S15 (C5-H8)- (C5-H6)- (C9-H11)+ (C9-H12) A´´ CH3as´´(2)

S16 (C16-H19+ (C16-H17) + (C16-H18) A´ OCH3s

S17 2(C16-H19)- (C16-H17)- (C16-H18) A´ OCH3as´

S18 (C16-H17 ) + (C16H18) A´ OCH3as´´

S19 C1-O3-C16 A´ COC

S20 2(O2-C1-O3)- (C13-C1-O2)- (C13-C1-O3) A´ OCO

S21 (C13-C1-O2)- (C13-C1-O3) A´ C-C=O

S22 5(H14-C13-H15) - (H14-C13-C1)- (H15-C13-C1)- (H14-C13-N4)- (H15-C13-N4)-

(N4-C13-C1) A´ CH2

S23 - (H14-C13-C1)- (H15-C13-C1)- (H14-C13-N4)- (H15-C13-N4)+ 4(N4-C13-C1) A´ NCC

S24 (H14-C13-C1)+ (H15-C13-C1)- (H14-C13-N4)- (H15-C13-N4) A´ CH2

S25 (H14-C13-C1)- (H15-C13-C1)- (H14-C13-N4)+ (H15-C13-N4) A´´ twCH2

S26 (H14-C13-C1)- (H15-C13-C1)+ (H14-C13-N4)- (H15-C13-N4) A´´ CH2

S27 2 (C5-N4-C9)- (C5-N4-C13)- (C9-N4-C13) A´ N(CH3)2

S28 (C5-N4-C13)- (C9-N4-C13) A´´ tw N(CH3)2

S29 (H6C5H8)+ (H8C5H7)+ (H6C5H7)- (H6C5N4)- (H8C5N4)- (H7C5N4)

+ (H11C9H12) +(H12C9H10)+(H11C9H10)- (H11C9N4)- (H12C9N4)- (H10C9N4) A´ CH3s(1)

S30 (H6C5H8)+ (H8C5H7)+ (H6C5H7)- (H6C5N4)- (H8C5N4)- (H7C5N4)

-(H11C9H12) -(H12C9H10)-(H11C9H10)+ (H11C9N4)+ (H12C9N4)+(H10C9N4) A´´ CH3s(2)

S31 -(H6C5H8)- (H8C5H7)+ 2(H6C5H7) - (H11C9H12) -(H12C9H10)+2 (H11C9H10) A´ CH3as´(1)

S32 -(H6C5H8)- (H8C5H7)+ 2(H6C5H7) + (H11C9H12) +(H12C9H10)-2 (H11C9H10) A´´ CH3as´(2)

S33 (H6C5H8)- (H8C5H7)+ (H11C9H12) -(H12C9H10) A´ CH3as´´(1)

S34 (H6C5H8) - (H8C5H7)- (H11C9H12) + (H12C9H10) A´´ CH3as´´(2)

S35 -(H6C5N4) - (H8C5N4)+2 (H7C5N4)- (H11C9N4)- (H12C9N4)+2 (H10C9N4) A´ CH3´(1)

S36 -(H6C5N4) - (H8C5N4)+2 (H7C5N4) + (H11C9N4)+ (H12C9N4)-2 (H10C9N4) A´´ CH3´(2)

S37 (H7C5N4) - (H8C5N4)+ (H11C9N4)+ (H12C9N4) A´ CH3´´(1)

S38 (H7C5N4) - (H8C5N4)- (H11C9N4)+ (H12C9N4) A´´ CH3´´(2)

S39 (H18C16H17) + (H17C16H19)+ (H18C16H19)- (H18C16O3)- (H17C16O3)- (H19C16O3) A´ OCH3s

S40 2 (C18C16H17) -  (C17 C16-H19)-  (C18 C16-H19) A´ OCH3as´

S41 (H17C16H19)- (H18C16H19) A´ OCH3as´´

S42 2 (C19 C16O3)-  (C17 C16O3)-  (C18 C16O3) A´ OCH3´

S43  (C17 C16O3)-  (C18 C16O3) -  (C19 C16O3) A´ OCH3´´

S44 C13-C1-O3-C16  A´´ C-O

S45 N4-C13-C1=O2 A´´ C-C

S46 (C1-C13-N4-C5)+ (C1-C13-N4-C9) A´´ C-N

S47 (H8-C5-N4-C13)+ (H12-C9-N4-C13) A´´ CH3s

S48 (H8-C5-N4-C13)- (H12-C9-N4-C13) A´ CH3as

S49 (H19-C16-O3-C1) A´´ OCH3

S50 O2 out of plane C13-C1-O3 A´´ C=O

S51 inversion A´ inversion

a , bond streching, , bending,  wagging,  rocking, tw, twisting,  torsion.

b Symmetry applies strictly only to Cs symmetry *ASC* conformer

Table S4 – DFT(B3LYP)/6-311++G** calculated frequencies and intensities, and normal coordinate analysis for dimethylglycine methyl ester (*ASC* conformer)a

Approximate Calculated frequency Intensity PEDb

Description non-scaled Scaled (0.978)

OCH3as´ 3156.4 3087.0 14.7 S17 (97.4)

OCH3as´´ 3122.6 3053.9 19.9 S18 (100.1)

CH3as´´(2) 3085.6 3017.7 54.4 S15 (99.9)

CH3as´´(1) 3083.1 3015.2 15.9 S14 (99.2)

CH2as 3061.7 2994.3 8.9 S6 (99.3)

OCH3s 3050.3 2983.2 20.4 S16 (95.1)

CH3as´(2) 3049.6 2982.5 33.8 S11 (20.2) + S13 (71.7)

CH3as´(1) 3049.0 2982.0 53.2 S10 (24.1) + S12 (68.1)

CH2s 3026.0 2959.5 21.5 S5 (99.0)

CH3s(1) 2978.5 2913.0 69.7 S10 (64.8) + S12 (29.9)

CH3s(2) 2971.9 2906.5 66.5 S11 (69.8) + S13 (25.7)

C=O 1791.8 1752.3 208.2 S1 (88.4)

CH3as´´(1) 1527.4 1493.8 17.3 S33 (85.0) + S35 (10.3)

CH3as´´(2) 1513.4 1480.1 3.9 S34 (91.3)

OCH3as´ 1498.0 1465.1 10.8 S40 (81.3) + S42 (10.0)

CH3as´(1) 1490.0 1457.3 16.6 S29 (14.3) + S31 (76.6)

OCH3as´´ 1483.5 1450.8 9.7 S41 (91.8)

CH3as´(2) 1478.3 1445.8 7.2 S32 (91.7)

CH3s(1) 1473.8 1441.4 2.8 S22 (12.0) + S29 (63.9) + S31 (13.7)

OCH3s 1468.0 1435.7 9.1 S39 (82.4)

CH2 1442.9 1411.2 16.7 S22 (77.5) + S29 (11.8)

CH3(2) 1441.0 1409.3 1.0 S30 (93.3)

CH2 1377.0 1346.7 6.5 S24 (78.8)

twCH2 1355.1 1325.3 9.5 S9 (20.8) + S25 (57.2)

CH3´(1) 1327.5 1298.3 26.9 S7 (24.1) + S8 (12.1) + S27 (10.8) + S33 (11.4) + S35 (33.0)

OCH3´ 1209.5 1182.9 149.0 S2 (20.6) + S42 (58.5)

C-O 1192.6 1166.3 189.4 S2 (17.0) + S20 (12.6) + S37 (17.2) + S42 (18.0)

N-Cas 1191.8 1165.5 19.7 S9 (25.7) + S25 (35.0)

CH3´´(1) 1171.9 1146.1 77.6 S2 (10.9) + S35 (10.7) + S37 (54.5)

OCH3´´ 1170.2 1144.5 1.5 S43 (90.7)

CH3´´(2) 1114.2 1089.7 7.0 S36 (17.7) + S38 (72.1)

C-N 1091.7 1067.7 95.4 S7 (37.2) + S8 (10.5) + S35 (33.4)

CH3´(2) 1070.3 1046.7 12.5 S9 (32.9) + S36 (57.9)

O-C 996.1 974.2 21.6 S3 (76.1) + S4 (9.9)

CH2 982.4 960.8 15.1 S9 (13.7) + S26 (56.9) + S50 (20.8)

CC 882.8 863.4 6.0 S2 (21.0) + S4 (27.7) + S23 (10.6)

N-Cs 839.0 820.6 3.6 S7 (21.1) + S8 (67.2)

OCO 704.7 689.2 27.0 S2 (10.0) + S4 (13.3) + S20 (30.4) + S23 (18.9)

C=O 580.3 567.6 4.2 S26 (20.3) + S50 (74.2)

CC=O 482.6 471.9 3.2 S4 (20.2) + S27 (26.4)

tw N(CH3)2 411.9 402.9 0.5 S26 (12.0) + S28 (74.8)

N(CH3)2 370.0 361.9 7.7 S27 (46.1) + S48 (11.4) + S51 (17.7)

COC 346.5 338.9 10.0 S19 (40.1) + S20 (12.5) + S21 (24.2) S51 (11.5)

inversion 266.0 260.2 11.8 S19 (20.5) + S20 (12.5) + S21 (16.3) + S51 (40.4)

CH3s 230.6 225.5 0.7 S47 (91.1)

CH3as 218.6 213.8 0.2 S27 (10.5) + S48 (82.9)

C-O 168.7 165.0 7.8 S44 (78.2) + S46 (18.6)

NCC 152.0 148.7 3.3 S21 (23.9) + S23 (40.0) + S51 (19.0)

OCH3 122.1 119.4 0.4 S46 (15.3) + S49 (78.4)

C-N 100.1 97.9 0.0 S44 (23.9) + S46 (60.7) + S49 (10.9)

C-C 34.0 33.2 0.7 S45 (105.8)

a Frequencies in cm-1, intensities in km mol-1. , bond streching, , bending,  rocking,  wagging, tw, twisting,  torsion. See Table S3 for definition of symmetry coordinates. b Only PED values greater than 10 % are given.

Table S5 – DFT(B3LYP)/6-311++G** calculated frequencies and intensities, and normal coordinate analysis for dimethylglycine methyl ester (*GSC* conformer)a

Approximate Calculated frequency Intensity PEDb

Description non-scaled scaled (0.978)

OCH3as´´ 3155.6 3086.2 14.1 S17 (23.1) + S18 (74.3)

CH3as´´(2) 3131.3 3062.4 9.4 S14 (41.6) + S15 (45.4)

OCH3as´ 3122.1 3053.4 19.8 S17 (76.1) + S18 (23.9)

CH3as´´(1) 3098.9 3030.7 31.2 S14 (49.7) + S15 (49.1)

CH3s(1) 3073.7 3006.0 27.2 S10 (25.3) + S11 (18.2) + S12 (22.9) + S13 18.6)

CH2 as 3065.3 2997.9 12.7 S5 (40.6) + S6 (55.4)

CH3as´(2) 3055.2 2988.0 29.8 S10 (22.7) + S11 (26.0) + S12 (21.7) + S13 (27.0)

OCH3s 3049.9 2982.8 35.0 S16 (97.2)

CH3as´(1) 2912.5 2848.4 190.0 S10 (41.9) + S12 (46.2)

CH3s(2) 2900.7 2836.9 47.8 S11 (49.6) + S13 (48.6)

CH2 s 2896.1 2832.4 46.8 S5 (51.6) + S6 (36.9)

C=O 1808.1 1768.4 232.5 S1 (88.3)

CH3as´´(1) 1512.0 1478.7 12.5 S33 (74.2)

CH3as´(1) 1506.8 1473.6 12.4 S31 (67.7) + S34 (10.0)

OCH3as´´ 1498.8 1465.9 8.9 S40 (20.6) + S41 (57.9) + S43 (12.3)

CH3as´´(2) 1495.9 1463.0 14.7 S34 (62.0)

CH3as´(2) 1487.2 1454.5 13.4 S32 (71.3)

OCH3as´ 1483.8 1451.1 9.8 S40 (69.2) + S41 (24.3)

CH3s(1) 1479.7 1447.2 0.7 S22 (15.8) + S29 (43.4) + S34 (14.4)

OCH3s 1469.8 1437.5 11.3 S39 (84.0)

CH2 1456.0 1424.0 10.2 S22 (68.3) + S29 (28.4)

CH3s(2) 1441.6 1409.9 0.6 S30 (100.9)

CH2 1405.7 1374.8 11.2 S24 (67.1)

twCH2 1314.5 1285.6 23.6 S25 (36.9) + S35 (11.3)

CH3´(1) 1308.4 1279.6 13.3 S7 (17.0) + S25 (21.7) + S35 (21.6)

N-Cas 1222.5 1195.6 201.1 S2 (20.2) + S9 (13.5) + S25 (18.6) + S43 (12.0)

OCH3´´ 1206.2 1179.7 6.6 S43 (64.7)

C-O 1179.7 1153.8 250.1 S2 (25.8) + S9 (10.8) + S20 (12.0) + S24 (12.5)

CH3´´(1) 1172.8 1147.0 35.8 S35 (14.1) + S37 (43.0) + S42 (21.3)

OCH3´ 1171.2 1145.5 7.2 S37 (13.3) + S42 (70.2)

CH3´´(2) 1117.9 1093.3 5.1 S36 (15.4) + S38 (74.9)

C-N 1084.1 1060.3 74.9 S7 (35.4) + S35 (19.5) + S37 (11.6)

CH3´(2) 1062.5 1039.1 18.2 S9 (35.4) + S36 (53.5)

O-C 1006.8 984.7 4.0 S3 (57.6) + S4 (10.1) + S8 (10.0)

CH2 997.2 975.3 10.7 S26 (57.4) + S50 (18.9)

C-C 903.5 883.6 9.4 S2 (22.8) + S4 (25.5)

(N-Cs 864.1 845.1 32.0 S7 (20.2) + S8 (63.3)

(OCO 719.2 703.3 6.7 S2 (10.1) + S19 (10.9) + S20 (37.1) + S23 (10.7)

(C=O 600.4 587.1 7.2 S26 (18.8) + S50 (75.4)

(N(CH3)2 486.1 475.4 0.2 S21 (14.6) + S27 (45.6)

(C-C=O 377.0 368.7 7.4 S19 (12.7) + S21 (27.5) + S27 (10.7) + S28 (11.9) + S51 (17.3)

tw N(CH3)2 370.1 362.0 3.2 S28 (46.1) + S51 (17.3)

inversion 338.9 331.5 3.6 S4 (11.4) + S19 (13.5) + S51 (46.8)

COC 300.1 293.5 11.1 S19 (32.9) + S20 (20.5) + S23 (16.5)

CH3as 259.4 253.7 1.5 S47 (24.0) + S48 (59.6)

CH3s 246.3 240.9 0.3 S47 (71.3) + S48 (23.2)

C-O 170.4 166.7 6.4 S44 (70.6) + S46 (21.4) + S49 (10.0)

NCC 155.2 151.8 2.2 S21 (25.9) + S23 (35.2)

OCH3 130.4 127.5 0.4 S49 (83.3)

C-N 90.7 88.7 0.6 S44 (19.6) + S46 (70.9)

C-C 41.3 40.4 0.4 S45 (108.5)

a Frequencies in cm-1, intensities in km mol-1. , bond streching, , bending,  rocking,  wagging, tw, twisting,  torsion. See Table S3 for definition of symmetry coordinates. b Only PED values greater than 10 % are given.
